# Supplementary material for: Determinants of continued maternal care seeking during pregnancy, birth and postnatal and associated neonatal survival outcomes in Kenya and Uganda: analysis of cross-sectional, demographic and health surveys data
Source: PubMed Central journal article supplement — BMJ Open. 2021 Dec 11;11(12):e054136. doi: 10.1136/bmjopen-2021-054136 (PMC8672021; doi:10.1136/bmjopen-2021-054136), 2021-12-11
Supplement: bmjopen-2021-054136supp001.pdf [file bmjopen-2021-054136supp001.pdf]

## Supplementary file 1.

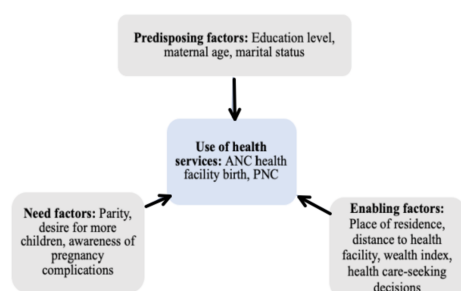

Figure showing behavioral model of utilization of health care services, modified from Andersen and Newman model.
