# Supplementary material for: Determinants of continued maternal care seeking during pregnancy, birth and postnatal and associated neonatal survival outcomes in Kenya and Uganda: analysis of cross-sectional, demographic and health surveys data
Source: PubMed Central journal article supplement — BMJ Open. 2021 Dec 11;11(12):e054136. doi: 10.1136/bmjopen-2021-054136 (PMC8672021; doi:10.1136/bmjopen-2021-054136), 2021-12-11
Supplement: bmjopen-2021-054136supp002.pdf [file bmjopen-2021-054136supp002.pdf]

## Supplementary file 2.

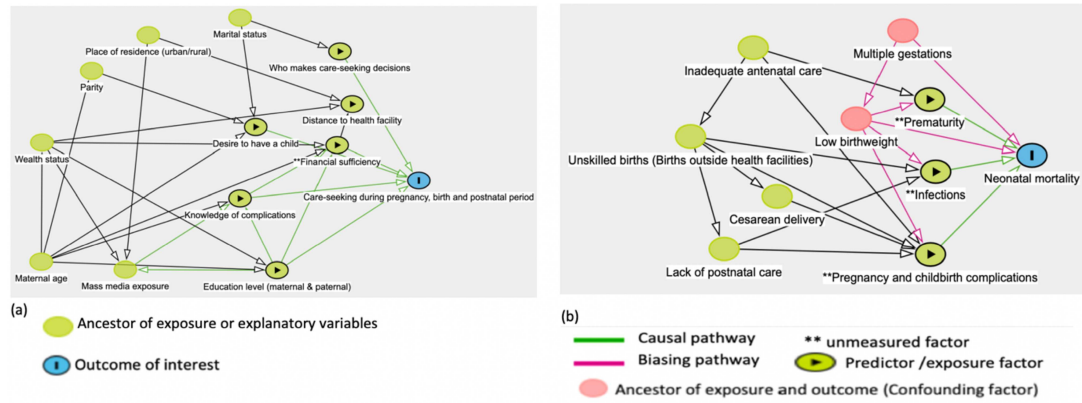

Figure 1: Directed acyclic graphs showing the predictor–outcome relationship for both care-seeking and neonatal survival in Kenya and Uganda, (Developed from [www.dagitty.net](http://www.dagitty.net), using DAGitty version 3.0.)
